# Supplementary material
Source: publisher figshare collection journal article supplement (https://gsapubs.figshare.com/ndownloader/files/38069214)
Supplement: Supplementary file 1 [file 38069214]

## Sheet: All location_x-set
Note: thickness in cm
trusklieve	pulleen	killard North	killard south	carrowmore	Furreera
9	15	11	28	28	18
9	17	5	24	20	11
9	4	6	44	20.3333	10
11	5	8	15	45	25
5	6	45	8	70	12
6	15	25	78	74	20
7	15	35	25	41	29
9	28	21	55	50	20
7	10	31	18	40	11
6	14	23	50	60	20
8	29	22	90	39	36
10	25	14	22	42	7
18	34	38	17	12.8	26
12	33	30	38	50	25
7.33333	28	22	32	40	28
4.66667	24	27	45	30	30
3.66667	32	15	15	38	12
17.6667	36	6	31	47	21
12	25	16	44	36	14
6.66667	12	35	26	62	17
5.5	7	6	10	29.4	18
22.6667	6	18	14	34.7	12
6.66667	49	40	17		11
17.6667	47	30	30		15
9	32	16	50		15
7	10	18	69		20
7	4	30	6		19
6	27	11	53		23
6	16	12	25		34
11	7	30	50		11
3	20	25	7		11
12	28	22	20		13
9	17	24	20		41
22	15	22	27		26
20	15	40	56		22
19	8	37	7		21
25	10	10	37		10
27	7	5	72		8
39.3333	15	25	10		15
3	19	35	14		21
6	9	16	10		7
12	22	7	13		5
5.33333	14.3333	26	38		15
8	15.3333	21	37		19
2	4	36	40		9
8	5	31	35		22
4	6	10	25		26
	15	26	19		15
	15	7	35		10
		5	9		9
		11	45		18
		26	28		12
		13	42		28
		65	58		22
		20	25		35
		72	21		15
		23	30		18
		36	35		22
		21	14		25
		61	26		15
		12	14		13
		13	13		12
		61	35		30
		21	37
		39	42
		8	17
		14	23
		42	14
		74	42
		35	68
		32	27
		26	32
		14	22
		20	18
		23	15
		48	32
		11	16
		27	55
		16	39
		17	50
		39	18
		30	37

## Sheet: Trusklieve_x-set
Note: (1) thickness in cm. (2) The last four entries for story 5 are thick cross sets. An interpretation for these sets as small bar forms cannot be ruled out. (3) x-set were not found from stories 1, 2 and 4.
total	story 1	story 2	story 3	story 4	story 5
			9		9
			9		7
			9		7
			11		6
			5		6
			6		11
			7		3
			9		12
			7		9
			6		22
			8		20
			10		19
			18		25
			12		27
			7.33333		39.3333
			4.66667		3
			3.66667		6
			17.6667		12
			12		5.33333
			6.66667		8
			5.5		2
			22.6667		8
			6.66667		4
			17.6667		28
					25.3333
					30
					51

## Sheet: Trusklieve_planer&lowAngle
Note: thickness in cm
total	story 1	story 2	story 3	story 4	story 5
	53	92	19.6667	27	12
	16	4	23.6667	15	37
	32	31	21.6667	17	5
	54	34	25		6
	42	27	28.3333		10
		20	38		28
		18	24		15
			19.6667		25
			16.3333		27
			15
			18
			8
			7
			4
			10
			6
			6
			10
			5
			17

## Sheet: Trusklieve_all set type
Note: (1) thickness in cm. (2) This tab shows x-set and planar/low angle sets combined for stories 3 and 5
total	story 1	story 2	story 3	story 4	story 5
			19.6667		12
			23.6667		37
			21.6667		9
			25		7
			28.3333		7
			9		6
			9		6
			9		11
			11		5
			5		3
			6		6
			7		10
			9		28
			7		15
			6		12
			8		9
			10		22
			38		20
			24		19
			19.6667		25
			18		27
			12		39.3333
			7.33333		3
			4.66667		6
			3.66667		12
			17.6667		5.33333
			16.3333		8
			12		2
			6.66667		8
			5.5		4
			22.6667		25
			15		28
			18		25.3333
			6.66667		30
			8		27
			7		51
			17.6667
			4
			10
			6
			6
			10
			5
			17

## Sheet: Trusklieve_bed thickness
Note: thickness in cm
total	story 1	story 2	story 3	story 4	story 5
35.4	35.4	36.5	29.1	54.9	46.9
33.1	33.1	44.1	45.1	45.4	50.8
41.7	41.7	69.1	40.3	34.8	32.5
45	45	33.1	54.4	34.3	65.7
19.4	19.4	27.2	45	21.6	41.1
26.7	26.7	24.1	54.5	37.1	31.4
39.8	39.8	155	101	51.8	40.4
48.4	48.4	58.6	76.7	42.7	26.5
28.7	28.7	69.8	28.1	95.9	59.8
32.6	32.6	73.3	27.4	38.1	69.5
33.6	33.6	66.7	47.9	60.9	83.6
38.8	38.8	57.6	31.3	45.6	62.2
52.6	52.6	1.95	36.9	68.4
39.5	39.5	79.5	21.1	105
42.1	42.1	78.5	33.1	34.4
35.3	35.3	42.8	34.5	47.6
50.9	50.9	49.8	69.3	45.7
101	101	98.5	41.7	33.5
42.6	42.6	87.8	93.1	42.1
35.9	35.9	79.4	76.1	49.1
33.6	33.6	63.3	49.8	90.1
21.8	21.8	64.3	53.7	81.8
44.6	44.6	105	38.4	54.2
41.4	41.4	147	42	71.9
24.4	24.4	92	40.7	138
39	39	80.4	51.5	76.5
37.4	37.4	71.4	31.2	35.1
34.6	34.6		61.6	64.1
78.6	78.6		30.9	67.5
49.7	49.7		93.3	105
41.4	41.4		58.3	60.6
93	93		45.3	72.5
61.3	61.3		39.9	49.6
36.5			131	51.9
44.1			82.8
69.1			54.6
33.1			91.9
27.2			63.6
24.1			65.9
155			59.1
58.6			42.8
69.8			48.8
73.3			65.3
66.7			88.2
57.6
1.95
79.5
78.5
42.8
49.8
98.5
87.8
79.4
63.3
64.3
105
147
92
80.4
71.4
29.1
45.1
40.3
54.4
45
54.5
101
76.7
28.1
27.4
47.9
31.3
36.9
21.1
33.1
34.5
69.3
41.7
93.1
76.1
49.8
53.7
38.4
42
40.7
51.5
31.2
61.6
30.9
93.3
58.3
45.3
39.9
131
82.8
54.6
91.9
63.6
65.9
59.1
42.8
48.8
65.3
88.2
54.9
45.4
34.8
34.3
21.6
37.1
51.8
42.7
95.9
38.1
60.9
45.6
68.4
105
34.4
47.6
45.7
33.5
42.1
49.1
90.1
81.8
54.2
71.9
138
76.5
35.1
64.1
67.5
105
60.6
72.5
49.6
51.9
46.9
50.8
32.5
65.7
41.1
31.4
40.4
26.5
59.8
69.5
83.6
62.2

## Sheet: Pulleen_bed thickness
Note: thickness in cm
total	story 1	story 2	story 3
92.3	92.3	65.1	282
174	174	31.1	287
140	140	52	236
108	108	78.3	190
76.8	76.8	125	214
71.3	71.3	123	159
65.1		96.4	100
31.1		94.6	166
52		96.7	198
78.3		103	108
125		144	59.6
123		83.5	87.6
96.4		178	80.7
94.6			126
96.7			171
103			106
144			176
83.5			92.3
178
282
287
236
190
214
159
100
166
198
108
59.6
87.6
80.7
126
171
106
176
92.3

## Sheet: Killard (North)_bed thickness
Note: thickness in cm
total	story 1	story 2
155	155	144
206	206	231
134	134	181
144		180
231		139
181		177
180		318
139
177
318

## Sheet: Fureerra_bed thickness
Note: thickness in cm
total	story 1
105	105
81.5	81.5
57.7	57.7
75.4	75.4
29.9	29.9
70.6	70.6
61.5	61.5
49	49
80.3	80.3
44.5	44.5
58.8	58.8
60.9	60.9
48.4	48.4
54.5	54.5
80.9	80.9
70.6	70.6
37.2	37.2
70.2	70.2
72.8	72.8
90.5	90.5
47.7	47.7
90.2	90.2
53	53
44.3	44.3
83.3	83.3
82.7	82.7
79.8	79.8
78.6	78.6
53.5	53.5
27.1	27.1
59	59
38.4	38.4
78.4	78.4
25.3	25.3
73.9	73.9
65.4	65.4
77.2	77.2
57.1	57.1
